# Supplementary material
Source: PubMed Central journal article supplement (PMC8284435)
Supplement: aac00412-21_supp_s1_seq4.pdf [file aac00412-21_supp_s1_seq4.pdf]

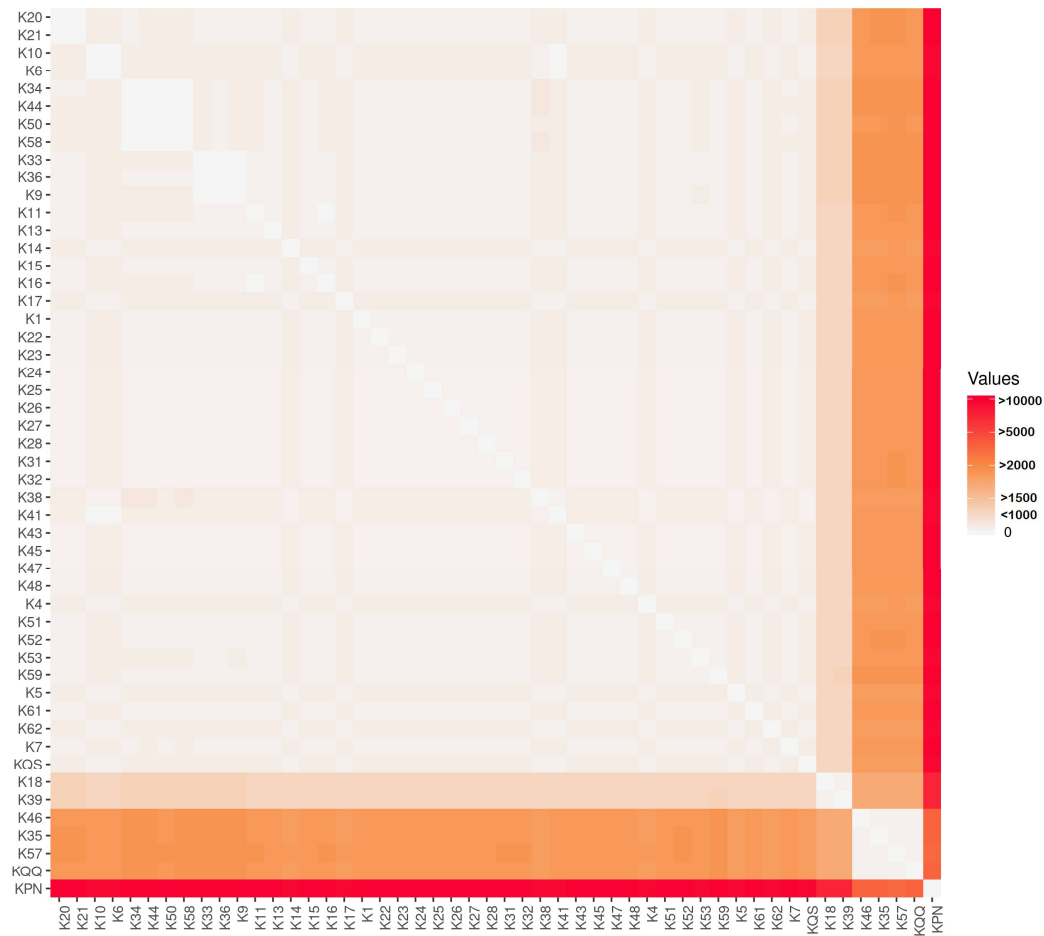

Supplementary Fig. 1. SNP matrix-based heatmap in a pairwise comparison between *Klebsiella quasipneumoniae* genomes. KQQ, *K. quasipneumoniae* subsp. *quasipneumoniae* MGH96 (GenBank assembly accession: GCA\_001033665.1); KQS, *K. quasipneumoniae* subsp. *similipneumoniae* strain ATCC 700603 (GenBank assembly accession: GCA\_003181175.1) and KPN, *K. pneumoniae* ATCC 35657 strain KPN1482. (GenBank: CP015134.1). The heatmap was drawn with Heatmapper (<http://www.heatmapper.ca/pairwise/>).
